# Supplementary material
Source: MDPI journal article supplement (https://www.mdpi.com/2673-7248/4/1/3)
Supplement: s1 [file s1]

*Article*

# **Mechanical Property Characterization of Architectural Coated Woven Fabrics Subjected to Freeze–Thaw Cycles**

**Hastia Asadi <sup>1,\*</sup>, Joerg Uhlemann <sup>1</sup>, Natalie Stranghoener <sup>1</sup> and Mathias Ulbricht <sup>2</sup>**

<sup>1</sup> Institute for Metal and Lightweight Structures, Faculty of Engineering, University of Duisburg-Essen, Universitätsstr. 15, 45141 Essen, Germany; joerg.uhlemann@uni-due.de (J.U.); natalie.stranghoener@uni-due.de (N.S.)

<sup>2</sup> Lehrstuhl für Technische Chemie II, Faculty of Chemistry, University of Duisburg-Essen, Universitätsstr. 7, 45117 Essen, Germany; mathias.ulbricht@uni-due.de

\* Correspondence: hastia.asadi@gmail.com

## **Supplementary material**

Results of all freeze-thaw experiments for glass-PTFE materials are listed in Table S1 and Table S2.

Table S1.  $k_{hum}$ , freeze-thaw cycles, glass-PTFE fabrics, warp direction

$f_{u,ave}$ : mean tensile strength,  $f_{u,5\%}$ : 5 % fractile of tensile strength,  $k_{hum,mean}$ : strength modification factor based on  $f_{u,ave}$ ,  $k_{hum,5\%}$ : strength modification factor based on  $f_{u,5\%}$

| Fabric                          | Material               | Standard              | Test method                             | f <sub>u</sub> [kN/m] |        |        |        |        |        | f <sub>u,ave</sub> [kN/m] | f <sub>u,δ</sub> % [kN/m] | SD   | COV  | k <sub>hum,δ</sub> % | k <sub>hum,mean</sub> |
|---------------------------------|------------------------|-----------------------|-----------------------------------------|-----------------------|--------|--------|--------|--------|--------|---------------------------|---------------------------|------|------|----------------------|-----------------------|
|                                 |                        |                       |                                         | Specimen number       |        |        |        |        |        |                           |                           |      |      |                      |                       |
|                                 |                        |                       |                                         | 1                     | 2      | 3      | 4      | 5      | 6      |                           |                           |      |      |                      |                       |
| Glass-PTFE type III             | Virgin                 | -                     | -                                       | 140.83                | 138.56 | 141.77 | 141.14 | 137.16 |        | 139.89                    | 135.35                    | 1.95 | 0.01 |                      |                       |
|                                 | Artificially weathered | ASTM D7792/ D7792M-15 | 0 cycle=In-out of plane watering, 720 h | 131.25                | 124.65 | 125.33 | 129.37 | 128.77 |        | 127.87                    | 121.36                    | 2.80 | 0.02 | 1.12                 | 1.09                  |
|                                 |                        |                       | Freeze-thaw, 26 cycle                   | 126.06                | 126.49 | 126.59 | 125.36 | 124.63 |        | 125.83                    | 123.90                    | 0.83 | 0.01 | 1.09                 | 1.11                  |
|                                 |                        |                       | Freeze-thaw, 50 cycle                   | 125.99                | 124.89 | 126.24 | 125.44 | 127.29 |        | 125.97                    | 123.87                    | 0.90 | 0.01 | 1.09                 | 1.11                  |
|                                 |                        |                       | Freeze-thaw, 76 cycle                   | 126.64                | 123.43 | 127.23 | 125.63 |        |        | 125.73                    | 121.33                    | 1.67 | 0.01 | 1.12                 | 1.11                  |
|                                 |                        |                       | Freeze-thaw, 100 cycle                  | 124.26                | 126.97 | 124.21 | 125.05 | 125.81 | 124.88 | 125.20                    | 122.91                    | 1.05 | 0.01 | 1.10                 | 1.12                  |
| Glass-PTFE type IV first batch  | Virgin                 | -                     | -                                       | 167.96                | 171.65 | 165.81 | 167.36 | 169.67 |        | 168.49                    | 163.27                    | 2.24 | 0.01 |                      |                       |
|                                 | Artificially weathered | ASTM D7792/ D7792M-15 | Freeze-thaw, 100 cycle                  | 138.38                | 141.63 | 142.02 | 136.36 | 137.54 |        | 139.19                    | 133.32                    | 2.52 | 0.02 | 1.22                 | 1.21                  |
| Glass-PTFE type IV second batch | Virgin                 | -                     | -                                       | 168.41                | 165.51 | 165.33 |        |        |        | 166.42                    | 160.59                    | 1.73 | 0.01 |                      |                       |
|                                 |                        | ASTM D7792/ D7792M-15 | Freeze-thaw, 26 cycle                   | 162.06                | 163.33 | 157.65 | 157.28 | 157.27 |        | 159.52                    | 152.67                    | 2.94 | 0.02 | 1.05                 | 1.04                  |
|                                 |                        |                       | Freeze-thaw, 50 cycle                   | 163.99                | 165.68 | 167.37 | 162.97 | 167.22 |        | 165.45                    | 160.92                    | 1.94 | 0.01 | 1.00                 | 1.01                  |
|                                 |                        |                       | Freeze-thaw, 76 cycle                   | 167.29                | 162.76 | 167.66 | 162.47 | 157.87 |        | 163.61                    | 154.22                    | 4.03 | 0.02 | 1.04                 | 1.02                  |
| Glass-PTFE type IV third batch  |                        | ASTM D7792/ D7792M-15 | Freeze-thaw, 100 cycle                  | 157.68                | 167.13 | 162.95 | 165.15 | 166.70 |        | 163.92                    | 154.94                    | 3.85 | 0.02 | 1.04                 | 1.02                  |
|                                 |                        |                       | -                                       | 167.23                | 168.14 | 165.74 | 168.56 | 168.80 |        | 167.69                    | 164.80                    | 1.24 | 0.01 |                      |                       |
| Glass-PTFE type IV fourth batch | Artificially weathered | ASTM D7792/ D7792M-15 | Freeze-thaw, 100 cycle                  | 121.51                | 132.87 | 133.14 | 136.97 | 136.43 |        | 132.18                    | 117.63                    | 6.25 | 0.05 | 1.40                 | 1.27                  |
|                                 | Virgin                 | -                     | -                                       | 179.69                | 180.37 | 180.66 | 181.15 | 179.17 |        | 180.21                    | 178.38                    | 0.78 | 0.00 |                      |                       |
|                                 | Artificially weathered | ASTM D7792/ D7792M-15 | Freeze-thaw, 100 cycle                  | 142.47                | 143.22 | 137.88 | 141.77 | 147.83 |        | 142.63                    | 134.34                    | 3.56 | 0.02 | 1.33                 | 1.26                  |

Table S2.  $k_{hum}$ , freeze-thaw cycles, glass-PTFE fabrics, weft direction

$f_{u,ave}$ : mean tensile strength,  $f_{u,5\%}$ : 5 % fractile of tensile strength,  $k_{hum,mean}$ : strength modification factor based on  $f_{u,ave}$ ,  $k_{hum,5\%}$ : strength modification factor based on  $f_{u,5\%}$

| Fabric                          | Material                       | Standard               | Test method                        | f <sub>u</sub> [kNm]   |           |           |           |           |   | f <sub>u,ave</sub> [kNm] | f <sub>u,5%</sub> [kNm] | SD   | COV  | k <sub>hum,5%</sub> | k <sub>hum,mean</sub> |
|---------------------------------|--------------------------------|------------------------|------------------------------------|------------------------|-----------|-----------|-----------|-----------|---|--------------------------|-------------------------|------|------|---------------------|-----------------------|
|                                 |                                |                        |                                    | Specimen number        |           |           |           |           |   |                          |                         |      |      |                     |                       |
|                                 |                                |                        |                                    | 1                      | 2         | 3         | 4         | 5         | 6 |                          |                         |      |      |                     |                       |
| Glass-PTFE type III             | Virgin                         | -                      | -                                  | 134,2654               | 135,08871 | 135,33412 | 137,01651 | 138,26948 |   | 135.99                   | 132.23                  | 1.62 | 0.01 |                     |                       |
|                                 | Artificially weathered         | ASTM D7792/ D792M-15   | Freeze-thaw, 0 cycle=thaw of plane | 124,29513              | 118,46074 | 123,87256 | 128,80973 | 127,4899  |   | 124.59                   | 115.24                  | 4.01 | 0.03 | 1.15                | 1.09                  |
|                                 |                                |                        | Freeze-thaw, 26 cycle              | 124,75412              | 123,73676 | 127,07027 | 127,03921 | 123,84352 |   | 125.25                   | 121.28                  | 1.71 | 0.01 | 1.09                | 1.09                  |
|                                 |                                |                        | Freeze-thaw, 50 cycle              | 124,41801              | 124,46666 | 126,1419  | 124,45151 | 126,34023 |   | 125.16                   | 122.87                  | 0.99 | 0.01 | 1.08                | 1.09                  |
|                                 |                                |                        | Freeze-thaw, 76 cycle              | 126,14604              | 123,95098 | 123,71038 | 126,14684 | 124,04279 |   | 124.80                   | 121.92                  | 1.24 | 0.01 | 1.08                | 1.09                  |
| Glass-PTFE type IV first batch  | Virgin                         | -                      | -                                  | 127,75981              | 125,2907  | 124,97019 | 127,21128 | 127,18071 |   | 126.48                   | 123.55                  | 1.26 | 0.01 | 1.07                | 1.08                  |
|                                 | Artificially weathered         | ASTM D7792/ D792M-15   | Freeze-thaw, 100 cycle             | 198,29758              | 184,88274 | 202,13484 | 191,06542 | 187,93363 |   | 192.86                   | 176.11                  | 7.19 | 0.04 |                     |                       |
|                                 |                                |                        | Freeze-thaw, 100 cycle             | 171,42268              | 169,9486  | 171,15252 | 166,63064 | 163,7927  |   | 168.59                   | 160.92                  | 3.29 | 0.02 | 1.09                | 1.14                  |
|                                 |                                |                        | Freeze-thaw, 26 cycle              | 183,35066              | 187,59545 | 190,24192 |           |           |   | 190.40                   | 180.69                  | 2.88 | 0.02 |                     |                       |
|                                 |                                |                        | Freeze-thaw, 50 cycle              | 136,36824              | 138,64676 | 137,03968 | 135,94631 | 137,4014  |   | 137.08                   | 134.65                  | 1.04 | 0.01 | 1.34                | 1.39                  |
| Glass-PTFE type IV second batch | Artificially weathered         | ASTM D7792/ D792M-15   | Freeze-thaw, 50 cycle              | 137,56282              | 138,95308 | 137,26715 | 128,0181  | 137,86569 |   | 135.93                   | 125.52                  | 4.47 | 0.03 | 1.44                | 1.40                  |
|                                 |                                |                        | Freeze-thaw, 76 cycle              | 136,24095              | 130,64437 | 136,7725  | 135,30907 |           |   | 134.74                   | 128.22                  | 2.80 | 0.02 | 1.41                | 1.41                  |
|                                 |                                |                        | Freeze-thaw, 100 cycle             | 136,68225              | 135,91068 | 134,80923 | 137,13846 | 136,96637 |   | 136.30                   | 134.07                  | 0.96 | 0.01 | 1.35                | 1.40                  |
|                                 |                                |                        | Freeze-thaw, 26 cycle              | 183,21365              | 197,05786 | 199,12007 | 191,63471 | 184,99754 |   | 193.20                   | 180.46                  | 5.47 | 0.03 |                     |                       |
|                                 | Glass-PTFE type IV third batch | Artificially weathered | ASTM D7792/ D792M-15               | Freeze-thaw, 100 cycle | 159,06762 | 163,08501 | 155,67228 | 149,46371 |   | 156.82                   | 141.66                  | 5.77 | 0.04 | 1.27                | 1.23                  |
| Glass-PTFE type IV fourth batch | Virgin                         | -                      | -                                  | 192,0845               | 183,29061 | 191,87029 | 189,08266 | 194,12117 |   | 190.09                   | 179.75                  | 4.20 | 0.02 |                     |                       |
|                                 | Artificially weathered         | ASTM D7792/ D792M-15   | Freeze-thaw, 100 cycle             | 153,51207              | 167,23265 | 157,40566 | 161,92464 | 162,31998 |   | 160.48                   | 147.63                  | 5.22 | 0.03 | 1.22                | 1.18                  |
